# Supplementary material for: Sulforaphane Suppresses the Growth of Triple-negative Breast Cancer Stem-like Cells In vitro and In vivo
Source: Oxford University Press journal article supplement (doi:10.1158/1940-6207.capr-18-0241), 2019-01-24
Supplement: 19406207capr180241-sup-204197_2_supp_5273290_pl65fl.docx [file 19406207capr180241-sup-204197_2_supp_5273290_pl65fl.docx]

**Supplementary Figure S1** SFN modulates CR1 promoter luciferase activity in MDA-MB-231-Luc-D3H1 cells. Dual luciferase assay of transiently transfected MDA-MB-231-Luc-D3H1 cells with human CR1promoter luciferase reporter vector. Cells were treated with 7.5 µM of SFN or saline in serum-free media at 37 oC for 48h. The results are the mean ± SD from three independent experiments with triplicate samples. * P < 0.0001, as compared to CR1 promoter with saline. SFN: Sulforaphane.
